# Supplementary material for: Controlled partial-exfoliation of graphite foil and integration with MnO2nanosheets for electrochemical capacitors
Source: Royal Society of Chemistry journal article supplement (doi:10.1039/c4nr06559j), 2015-01-01
Supplement: c4nr06559j2.pdf [file c4nr06559j2.pdf]

## Supporting Information

# Controlled Partial-Exfoliation of Graphite Foil and Integration with MnO<sub>2</sub> Nanosheets for Electrochemical Capacitors

*Yu Song<sup>a</sup>, Dong-Yang Feng<sup>a</sup>, Tianyu Liu<sup>b</sup>, Yat Li<sup>\*,b</sup>, Xiao-Xia Liu<sup>\*,a</sup>*

<sup>a</sup> Department of Chemistry, Northeastern University, Shenyang, 110819, China

<sup>b</sup> Department of Chemistry and Biochemistry, University of California, 1156 High Street, Santa Cruz, California 95064, United States

Corresponding author:

Yat Li. Fax: +1 8314592935; Tel: +1 8314591952; Email: yatli@ucsc.edu

Xiao-Xia Liu. Fax: +86 024 83684323; Tel: +86 024 83684323; E-mail: xxliu@mail.neu.edu.cn

## Calculations

### *Capacitance calculated based on constant current charge/discharge profile*

**Areal** and gravimetric capacitance of a single electrode from the constant current charge/discharge profile are calculated from equation S1 and S2, respectively:

$$C_a = \frac{It}{S\Delta U} \quad (\text{Equation S1})$$

$$C_g = \frac{It}{m\Delta U} \quad (\text{Equation S2})$$

Where  $C_a$  is the areal capacitance (mF/cm<sup>2</sup>) and  $C_g$  is the gravimetric capacitance,  $S$  is the area of electrode (cm<sup>2</sup>),  $I$  represents the discharge current density (mA),  $m$  is the mass of active material (mg),  $t$  is the discharge time (s) and  $\Delta U$  is the potential window (V).

### ***Areal** energy density and power density of a single electrode*

Areal energy density ( $E$ , Wh/m<sup>2</sup>) and power density ( $P$ , W/m<sup>2</sup>) were calculated using the following two equations:

$$E = \frac{10000}{2 \times 3600 \times 1000} C_a (\Delta U)^2 \quad (\text{Equation S3})$$

$$P = \frac{3600E}{t} \quad (\text{Equation S4})$$

Where  $C_a$  is the **areal** capacitance (mF/cm<sup>2</sup>),  $\Delta U$  is the potential window (V) and  $t$  is the discharge time measured in constant current charge-discharge profiles (s).

## Supplementary Figures

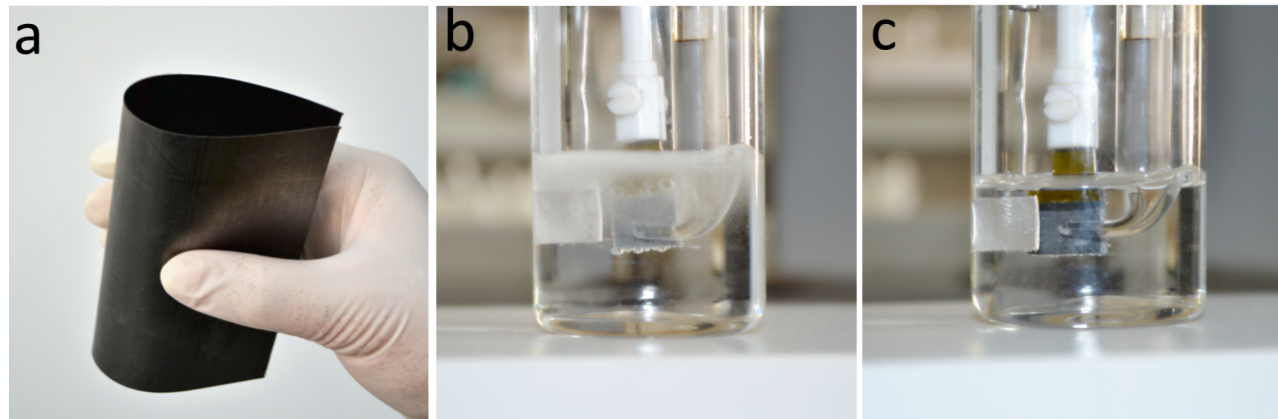

**Figure S1** Digital photographs of a piece of flexible graphite foil (a), primary exfoliation process (b), and secondary exfoliation process (c) carried out in a three-electrode electrochemical reactor.

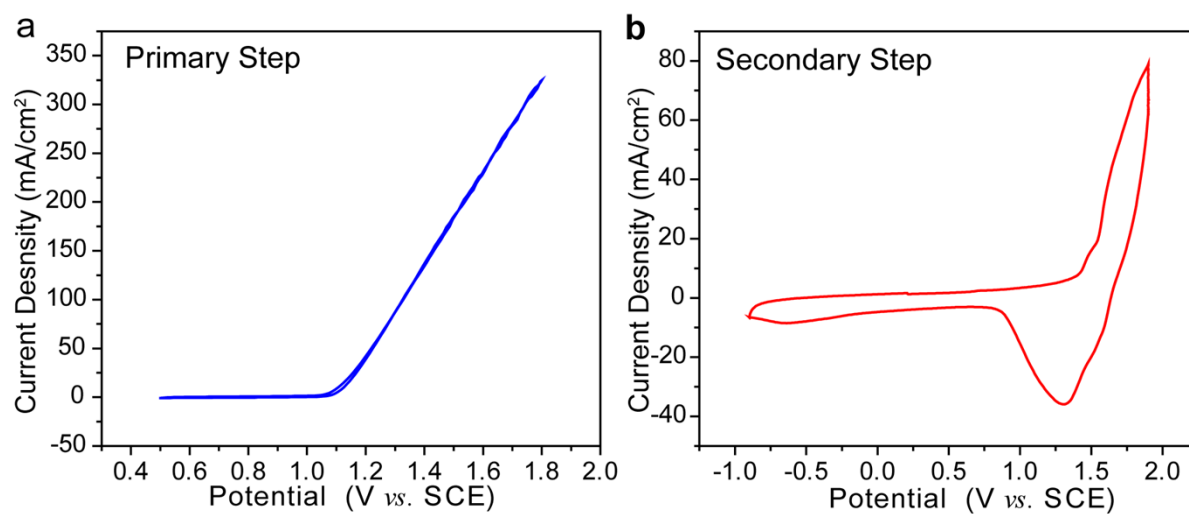

**Figure S2** CV profiles of the primary exfoliation (a) and ACV profile of the secondary exfoliation (b) processes collected at a scan rate of 20 mV/s.

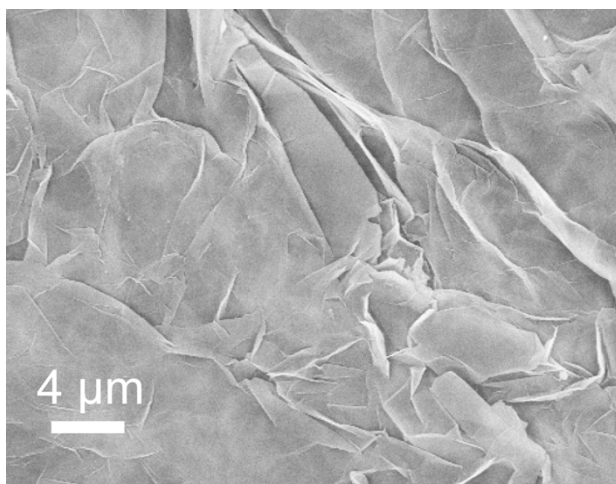

**Figure S3** SEM image showing the morphology of graphite foil after second-step-only exfoliation.

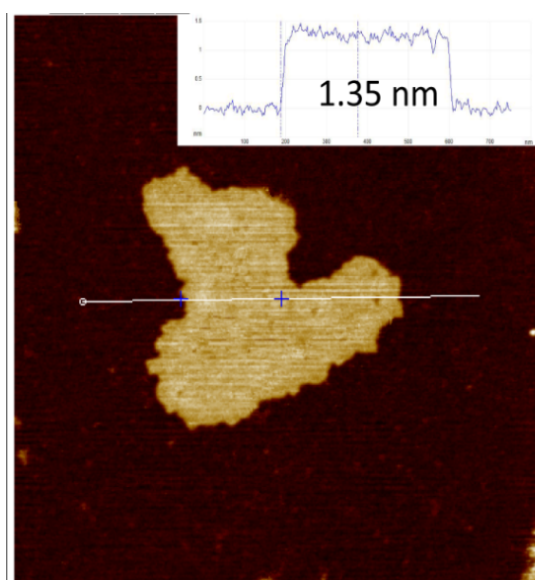

**Figure S4** AFM image of a piece of graphene sheet exfoliated from the FEG substrate. Inset shows the height profile of AFM image corresponding to the line shown in this image.

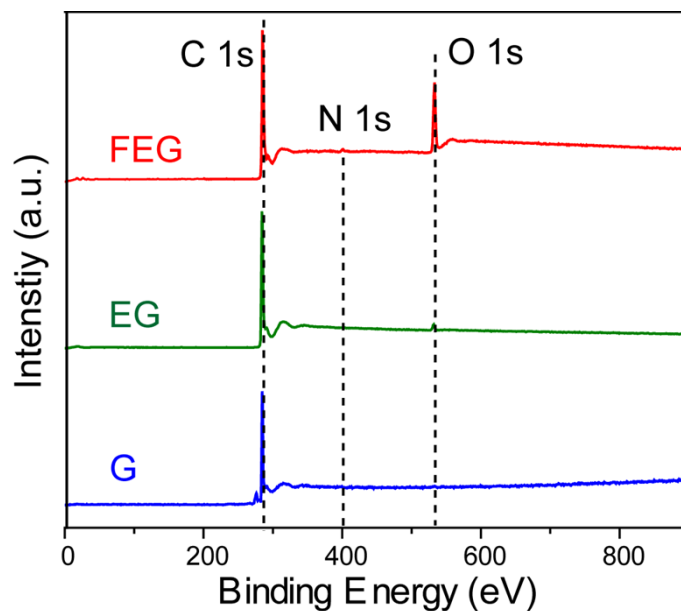

**Figure S5** XPS survey spectra of G, EG, and FEG.

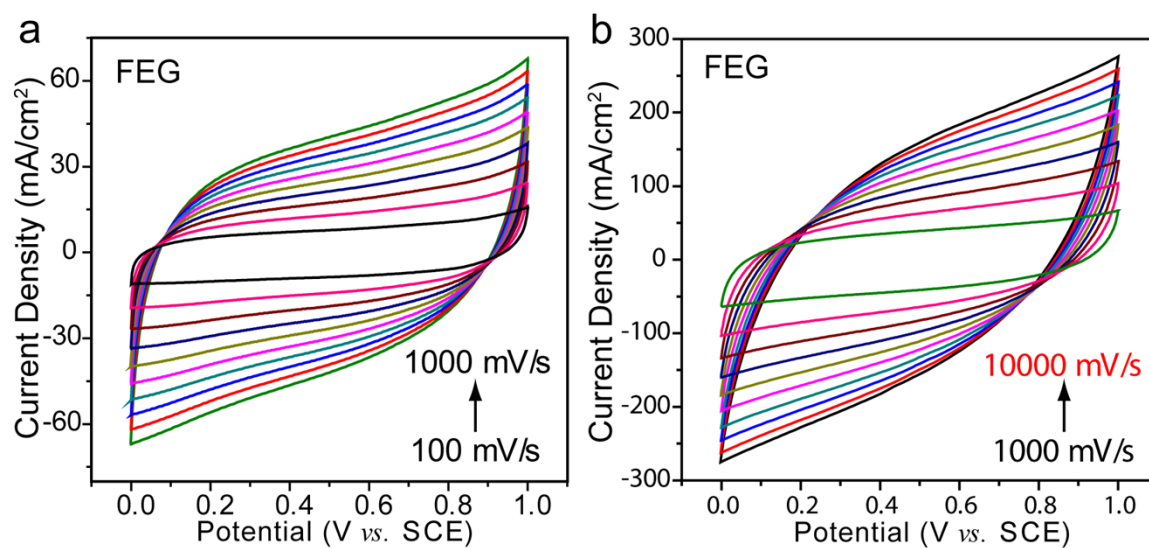

**Figure S6** CV curves of FEG substrate collected at various scan rates in 3 M KCl aqueous electrolyte: from 100 mV/s to 1000 mV/s (a) and from 1000 mV/s to 10000 mV/s (b).

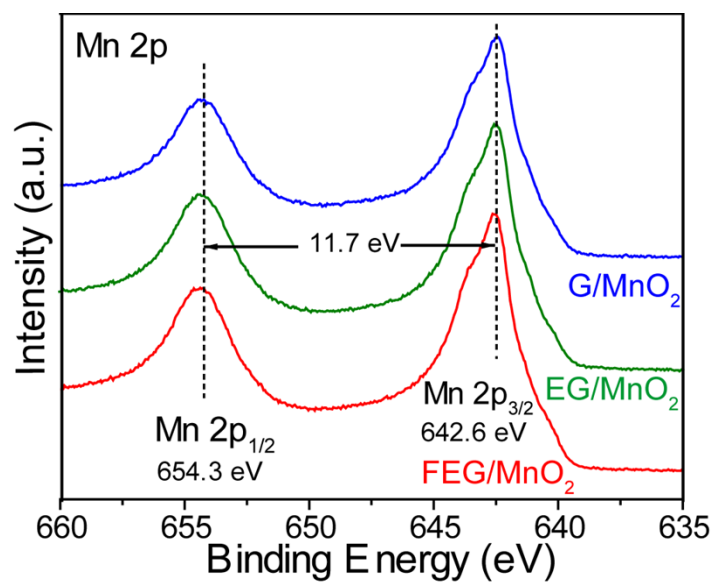

**Figure S7** Mn 2p XPS spectra of G/MnO<sub>2</sub>, EG/MnO<sub>2</sub>, and FEG/MnO<sub>2</sub>.

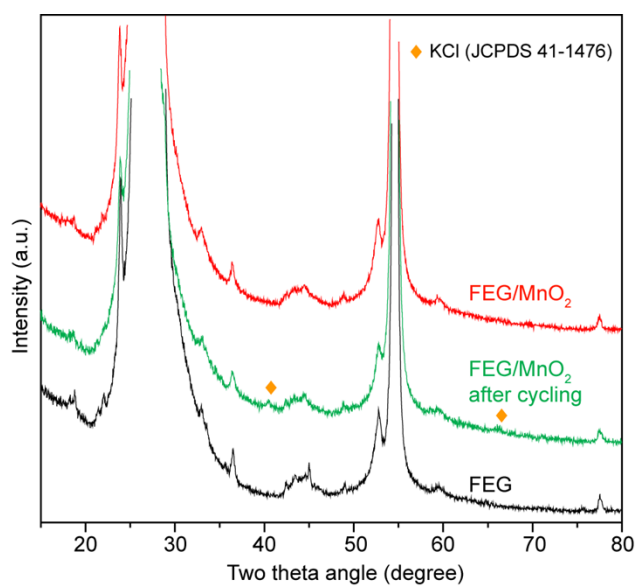

**Figure S8** XRD spectra collected for FEG/MnO<sub>2</sub> before and after cycling test.

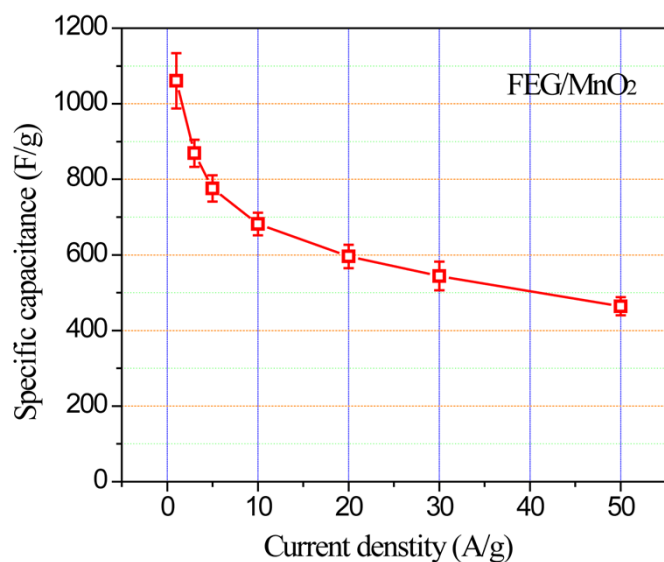

**Figure S9** Specific capacitance of FEG/MnO<sub>2</sub> at different current densities with error bars (calculated from three parallel samples) for each capacitance.

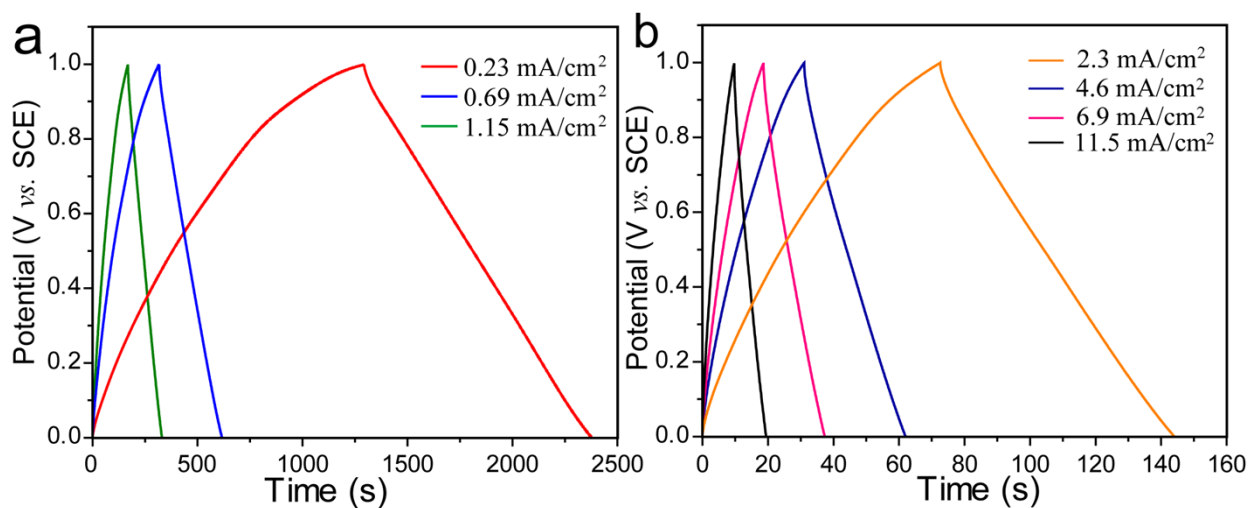

**Figure S10** Constant current charge/discharge profiles of FEG/MnO<sub>2</sub> at various current densities from 0.23 mA/cm<sup>2</sup> to 1.15 mA/cm<sup>2</sup> (a) and from 2.3 mA/cm<sup>2</sup> to 11.5 mA/cm<sup>2</sup> (b).

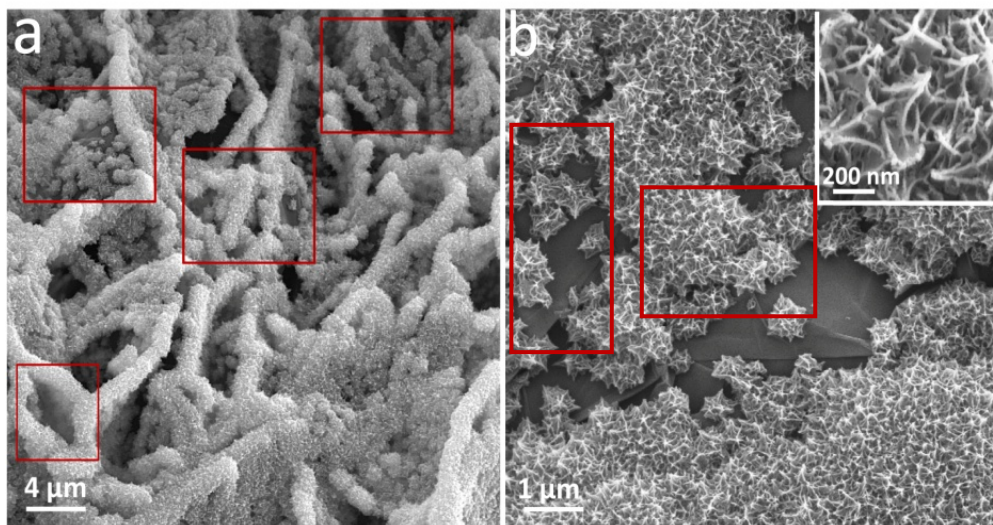

**Figure S11** SEM images of EG/MnO<sub>2</sub> (a) and G/MnO<sub>2</sub> (b). Inset of (b) showed the morphology of deposited MnO<sub>2</sub> nanosheets. Red boxes highlight the exposed area of substrate.

Here we proposed the following reasons to explain the morphology of the three electrodes. The lattice structure of graphene is much different from that of MnO<sub>2</sub>. Hence the electro-deposition of MnO<sub>2</sub> on graphene sheets is a heterogeneous reaction, causing the slow formation of embryonic nuclei on graphene surface for MnO<sub>2</sub> to grow. Once there are several MnO<sub>2</sub> nuclei formed, it will be much easier for Mn<sup>2+</sup> to diffuse to the already formed MnO<sub>2</sub> nucleus and grow rather than to elsewhere because the growth of MnO<sub>2</sub> nanosheets on MnO<sub>2</sub> nucleus is homogeneous. As a result, MnO<sub>2</sub> nanosheets tend to accumulate around the nucleation sites and finally lead to non-uniformity. What's more, locally aggregated MnO<sub>2</sub> cluster is unfavorable for pseudo-capacitors since it is hard for electrons to diffuse through thick and poorly conductive layers. However, the oxygen-containing functional groups on FEG surface could capture Mn<sup>2+</sup> in the electrolyte through the coordination bonding between oxygen atoms and manganese ions. Thus, the enrichment of Mn<sup>2+</sup> ions on graphene surfaces as well as the highly efficient charge transfer property of FEG will facilitate the simultaneous formation and provide plenty of transient, nanoscale ordered regions for MnO<sub>2</sub> nucleation, and favor the growth of MnO<sub>2</sub> nanosheets to form uniform nanoarrays.
